# Supplementary material
Source: Springer Nature journal article supplement (https://www.springermedizin.de/resource/supplementary/12877_2014_1051_MOESM1_ESM.pdf/9440708)
Supplement: MOESM1 [file 9440708]

**Additional file 1. ICPC codes for the selection patients with geriatric giants in the Opti-Med study**

| <b>Category</b>             | <b>Code</b>              | <b>Description</b>                                  |
|-----------------------------|--------------------------|-----------------------------------------------------|
| General                     | A05                      | Feeling ill                                         |
| Instability /<br>immobility | A06                      | Fainting/syncope                                    |
|                             | A10                      | Bleeding-haemorrhage not otherwise specified        |
|                             | A28                      | Limited function/disability not otherwise specified |
|                             | A80                      | Trauma/injury not otherwise specified               |
|                             | H82                      | Vertiginous syndrome / labyrinthitis                |
|                             | K88                      | Postural hypotension                                |
|                             | L02                      | Back symptom/complaint                              |
|                             | L03                      | Low back symptom/complaint without radiating pain   |
|                             | L13                      | Hip symptom/complaint                               |
|                             | L14                      | Leg/thigh symptom/complaint                         |
|                             | L15                      | Knee symptom/complaint                              |
|                             | L16                      | Ankle symptom/complaint                             |
|                             | L17                      | Foot/toe symptom/complaint                          |
|                             | L28                      | Limited function/disability                         |
|                             | L72                      | Fracture: radius/ulna                               |
|                             | L73                      | Fracture: tibia/fibula                              |
|                             | L74                      | Fracture: hand/foot bone                            |
|                             | L75                      | Fracture: femur                                     |
|                             | L76                      | Fracture: other                                     |
|                             | L77                      | Sprain/strain of ankle                              |
|                             | L78                      | Sprain/strain of knee                               |
|                             | L79                      | Sprain/strain of joint not otherwise specified      |
|                             | L80                      | Dislocation/subluxation                             |
|                             | L81                      | Injury musculoskeletal not otherwise specified      |
|                             | L86                      | Low back symptom/complaint with radiating pain      |
|                             | L96                      | Acute internal damage knee                          |
|                             | N17                      | Vertigo/dizziness                                   |
|                             | N18                      | Paralysis/weakness                                  |
|                             | N79                      | Concussion                                          |
|                             | N80                      | Head injury other                                   |
|                             | S16                      | Bruise/contusion                                    |
| S17                         | Abrasion/scratch/blister |                                                     |
| S18                         | Laceration/cut           |                                                     |
| S19                         | Skin injury other        |                                                     |
| Cognitive<br>impairment     | P20                      | Memory / concentration / orientation disturbance    |
|                             | P71                      | Organic psychosis other                             |
|                             | P73                      | Affective psychosis                                 |
|                             | P01                      | Feeling anxious/nervous/tense                       |
|                             | P03                      | Feeling depressed                                   |
|                             | P05                      | Senility, feeling/behaving old                      |
|                             | P74                      | Anxiety disorder/anxiety state                      |
| P76                         | Depressive disorder      |                                                     |
| Urine incontinence          | U04                      | Incontinence urine                                  |
